# Supplementary material for: Generation of singlet oxygen catalyzed by the room-temperature-stable anthraquinone anion radical
Source: Royal Society of Chemistry journal article supplement (doi:10.1039/d2cp01819e), 2022-01-01
Supplement: d2cp01819e1.pdf [file d2cp01819e1.pdf]

Supporting Information for:

Generation of Singlet Oxygen Catalyzed by Room Temperature Stable Anthraquinone  
Anion Radical

Xiaowei Duan, Zhongjun Zhou\*, Xuri Huang, Zexing Qu\*

Institute of Theoretical Chemistry, College of Chemistry, Jilin University, Changchun,  
130023, China

\*Corresponding author e-mail:

zxqu@jlu.edu.cn

Contents:

Supporting Table S1-S8

Supporting Figure S1-S3

Cartesian Coordinates

Table S1: The energies for KOtBu, singlet state ( $E_s$ ) and triplet state ( $E_t$ ) AQ-(KOtBu)<sub>n</sub> (n=0, 1, 2 and 3). The complexing energy ( $E_B$ ) of AQ-(KOtBu)<sub>n</sub>. The CAM-B3LYP functional at 6-311+G(d) level was used in all the DFT calculations. The geometries were optimized by polarizable continuum model (PCM) in dimethyl sulfoxide solvent.

|                                      | $E_s$ (a.u.) | $E_t$ (a.u.) | $E_B$ (kcal/mol)                                       |
|--------------------------------------|--------------|--------------|--------------------------------------------------------|
| KOtBu                                | -832.9768114 | --           | --                                                     |
| AQ                                   | -688.5740382 | -688.4673215 | -9.4                                                   |
| AQ-(KOtBu) <sub>1</sub>              | -1521.565793 | -1521.516644 | 2.9 <sup>a</sup> /-7.3 <sup>b</sup> /-7.5 <sup>c</sup> |
| AQ-(KOtBu) <sub>2</sub> <sup>a</sup> | -2354.537908 | -2354.534487 | -13.6                                                  |
| AQ-(KOtBu) <sub>2</sub> <sup>b</sup> | -2354.554236 | -2354.530251 | -3.3                                                   |
| AQ-(KOtBu) <sub>2</sub> <sup>c</sup> | -2354.554479 | -2354.531034 | -3.2                                                   |
| AQ-(KOtBu) <sub>3</sub>              | -3187.525278 | -3187.536339 | -4.7                                                   |

|                                    |              |              |  |
|------------------------------------|--------------|--------------|--|
| (AQ–KOTBu)/AQ-(KOTBu) <sub>4</sub> | -4020.498195 | -4020.520596 |  |
|------------------------------------|--------------|--------------|--|

The site of ligand KOTBu:

AQ-(KOTBu)<sub>1</sub>: I or II or III or IV;

AQ-(KOTBu)<sub>2</sub><sup>a</sup>: I, II or III, IV;

AQ-(KOTBu)<sub>2</sub><sup>b</sup>: I, IV or II, III;

AQ-(KOTBu)<sub>2</sub><sup>c</sup>: I, III or II, IV;

AQ-(KOTBu)<sub>3</sub>: I, II, III or I, II, IV or II, III, IV;

(AQ–KOTBu)/AQ-(KOTBu)<sub>4</sub>: I, II, III, IV.

(The site of ligand KOTBu is marked in Figure 1).

AQ-(KOTBu)<sub>m-1</sub> + KOTBu → AQ-(KOTBu)<sub>m</sub> (m=1, 2, 3 and 4)

$E_B = E[\text{AQ}-(\text{KOTBu})_m] - E[\text{AQ}-(\text{KOTBu})_{m-1}] - E[\text{KOTBu}]$

Table S2: The ESP charge for K, AQ and OtBu in AQ–KOTBu. The CAM-B3LYP functional at 6-311+G(d) level was used in all the DFT calculations.

|      | ESP charge (eV) |
|------|-----------------|
| K    | 0.85            |
| AQ   | -0.83           |
| OtBu | -0.64           |

Table S3: The UV-Vis absorption wavelength and the natural transition orbitals for ONIOM-1, ONIOM-2, ONIOM-3 and CAM-B3LYP.

|         |                | wavelength | Hole                                                                                | Electron                                                                              |
|---------|----------------|------------|-------------------------------------------------------------------------------------|---------------------------------------------------------------------------------------|
| ONIOM-1 | D <sub>1</sub> | 654.19 nm  | 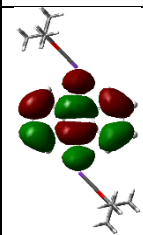 |  |

|         |                |           |                                                                                     |                                                                                       |
|---------|----------------|-----------|-------------------------------------------------------------------------------------|---------------------------------------------------------------------------------------|
|         | D <sub>2</sub> | 384.66 nm | 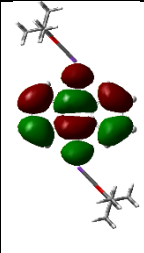   |    |
| ONIOM-2 | T              | 373.95 nm |    |    |
| ONIOM-3 | T <sub>1</sub> | 842.76 nm |    |    |
|         | T <sub>2</sub> | 409.16 nm |   |   |
| CAM-B3  | T <sub>1</sub> | 652.70nm  |  |  |
| LYP     | T <sub>2</sub> | 396.97nm  |  |  |

Table S4: The active orbitals of NEVPT2 (4e, 6o) of the simplified model, ( $C^M$ ).

|                                                                                     |                                                                                     |                                                                                       |
|-------------------------------------------------------------------------------------|-------------------------------------------------------------------------------------|---------------------------------------------------------------------------------------|
| $\pi_{AQ}(b_{2g})$                                                                  | $\pi_{AQ}^*(b_{3u})$                                                                | $\pi_{AN}^*(a_u)$                                                                     |
| 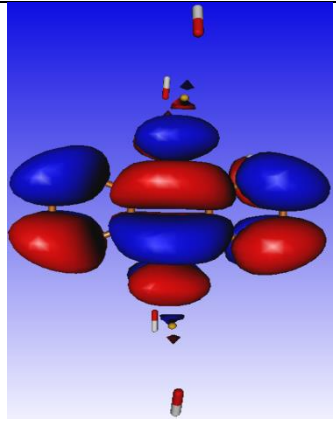   |    |    |
| $\sigma_{OH}(a_g)$                                                                  | $\pi_{OH}(a_u)$                                                                     | $\pi_{AN}'(b_{1g})$                                                                   |
|  |  |  |

Table S5: The singly occupied molecular orbitals (SOMOs) and energies (E) for these transitions by means of NEVPT2 (4e/6o) at 6-311+G(d) level.

| State                             | SOMOs                                  | E (a.u.)           |
|-----------------------------------|----------------------------------------|--------------------|
| T <sub>0</sub> (B <sub>2u</sub> ) | $\pi_{OH}(a_u), \pi_{AQ}(b_{2g})$      | -3386.009810343247 |
| T <sub>1</sub> (B <sub>2g</sub> ) | $\sigma_{OH}(a_g), \pi_{AQ}(b_{2g})$   | -3386.007405617286 |
| T <sub>2</sub> (B <sub>3g</sub> ) | $\pi_{OH}(a_u), \pi_{AQ}^*(b_{3u})$    | -3385.940086643221 |
| T <sub>3</sub> (B <sub>3u</sub> ) | $\sigma_{OH}(a_g), \pi_{AQ}^*(b_{3u})$ | -3385.937604322479 |
| T <sub>4</sub> (A <sub>g</sub> )  | $\pi_{OH}(a_u), \pi_{AN}^*(a_u)$       | -3385.890365353002 |
| T <sub>5</sub> (A <sub>u</sub> )  | $\sigma_{OH}(a_g), \pi_{AN}^*(a_u)$    | -3385.887743770551 |

Table S6: The ground state energy (E) for the OtBu radical. The DFT calculation for

energy is performed at 6-311+G(d) level and CAM-B3LYP functional.

|                | E (a.u.)     |
|----------------|--------------|
| D <sub>0</sub> | -232.9402852 |

Table S7: The energies (E) for <sup>3</sup>O<sub>2</sub>, <sup>1</sup>O<sub>2</sub>, N<sub>2</sub>, C<sub>(1)</sub>, C<sub>(1)</sub>@N<sub>2</sub>, <sup>1</sup>[C<sub>(1)</sub>@<sup>1</sup>O<sub>2</sub>], and <sup>5</sup>[C<sub>(1)</sub>@<sup>1</sup>O<sub>2</sub>]. The geometry optimization and energy calculations were performed at 6-311+G(d) level and CAM-B3LYP functional in gas phase.

|                                                                | E (a.u.)      |
|----------------------------------------------------------------|---------------|
| <sup>3</sup> O <sub>2</sub>                                    | -150.3252087  |
| <sup>1</sup> O <sub>2</sub>                                    | -150.3081769  |
| N <sub>2</sub>                                                 | -109.5155007  |
| C <sub>(1)</sub>                                               | -4020.5386257 |
| C <sub>(1)</sub> @N <sub>2</sub>                               | -4130.2018947 |
| <sup>1</sup> [C <sub>(1)</sub> @ <sup>1</sup> O <sub>2</sub> ] | -4170.981526  |
| <sup>5</sup> [C <sub>(1)</sub> @ <sup>1</sup> O <sub>2</sub> ] | -4170.913105  |

Table S8: The distance ,R(O<sub>2</sub>-AQ), between O<sub>2</sub> and [AQ·]<sup>-</sup>. The energies of the reactant (R) and the product (P<sub>1</sub><sup>OS</sup> and P<sub>1</sub><sup>CS</sup>). The diabatic couplings (V<sub>12</sub><sup>OS</sup> and V<sub>12</sub><sup>CS</sup>) between the reactant state and the product states. The superscripts OS and CS are the open-shell oxygen and the closed shell oxygen, respectively.

| R(O <sub>2</sub> -AQ) | R (a.u.)    | P <sub>1</sub> <sup>OS</sup> (a.u.) | P <sub>2</sub> <sup>CS</sup> (a.u.) | V <sub>12</sub> <sup>OS</sup> (eV) | V <sub>12</sub> <sup>CS</sup> (eV) |
|-----------------------|-------------|-------------------------------------|-------------------------------------|------------------------------------|------------------------------------|
| 1.8 Å                 | -838.498643 | -838.451994                         | -838.456947                         | 1.11E-02                           | 3.57E-09                           |
| 1.9 Å                 | -838.545367 | -838.499603                         | -838.503404                         | 9.24E-03                           | 5.73E-09                           |
| 2.0 Å                 | -838.580329 | -838.535440                         | -838.538443                         | 7.58E-03                           | 5.03E-09                           |
| 2.1 Å                 | -838.606256 | -838.562158                         | -838.564631                         | 6.13E-03                           | 4.59E-09                           |
| 2.2 Å                 | -838.625338 | -838.581921                         | -838.584053                         | 4.89E-03                           | 3.32E-09                           |
| 2.3 Å                 | -838.639282 | -838.596437                         | -838.598353                         | 3.85E-03                           | 2.62E-09                           |
| 2.4 Å                 | -838.649388 | -838.607012                         | -838.608791                         | 2.98E-03                           | 1.98E-09                           |
| 2.5 Å                 | -838.656683 | -838.614689                         | -838.616379                         | 2.28E-03                           | 1.42E-09                           |
| 2.6 Å                 | -838.661900 | -838.620206                         | -838.621838                         | 1.72E-03                           | 1.02E-09                           |
| 2.7 Å                 | -838.665633 | -838.624178                         | -838.625770                         | 1.28E-03                           | 7.37E-10                           |

|       |             |             |             |          |          |
|-------|-------------|-------------|-------------|----------|----------|
| 2.8 Å | -838.668296 | -838.627024 | -838.628587 | 9.44E-04 | 4.94E-10 |
| 2.9 Å | -838.670193 | -838.629061 | -838.630603 | 6.86E-04 | 3.62E-10 |
| 3.0 Å | -838.671549 | -838.630524 | -838.632049 | 4.92E-04 | 2.45E-10 |
| 3.1 Å | -838.672490 | -838.631544 | -838.633055 | 3.50E-04 | 1.67E-10 |
| 3.2 Å | -838.673149 | -838.632262 | -838.633763 | 2.46E-04 | 1.12E-10 |
| 3.3 Å | -838.673622 | -838.632778 | -838.634271 | 1.71E-04 | 7.46E-11 |
| 3.4 Å | -838.673945 | -838.633132 | -838.634617 | 1.18E-04 | 4.98E-11 |
| 3.6 Å | -838.674336 | -838.633563 | -838.635039 | 5.45E-05 | 2.10E-11 |
| 3.8 Å | -838.674560 | -838.633808 | -838.635276 | 2.42E-05 | 8.78E-12 |
| 4.0 Å | -838.674688 | -838.633950 | -838.635414 | 1.03E-05 | 3.49E-12 |
| 4.5 Å | -838.674852 | -838.634123 | -838.635581 | 9.58E-07 | 2.77E-13 |

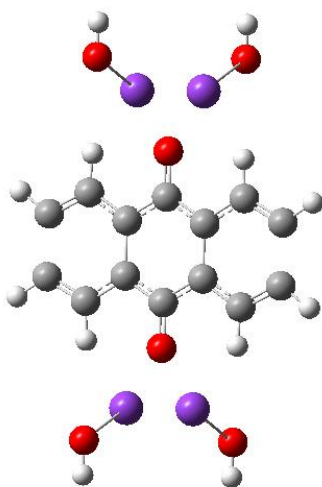

Figure S1. The simplified model ( $C^M$ ) for AQ-KOtBu

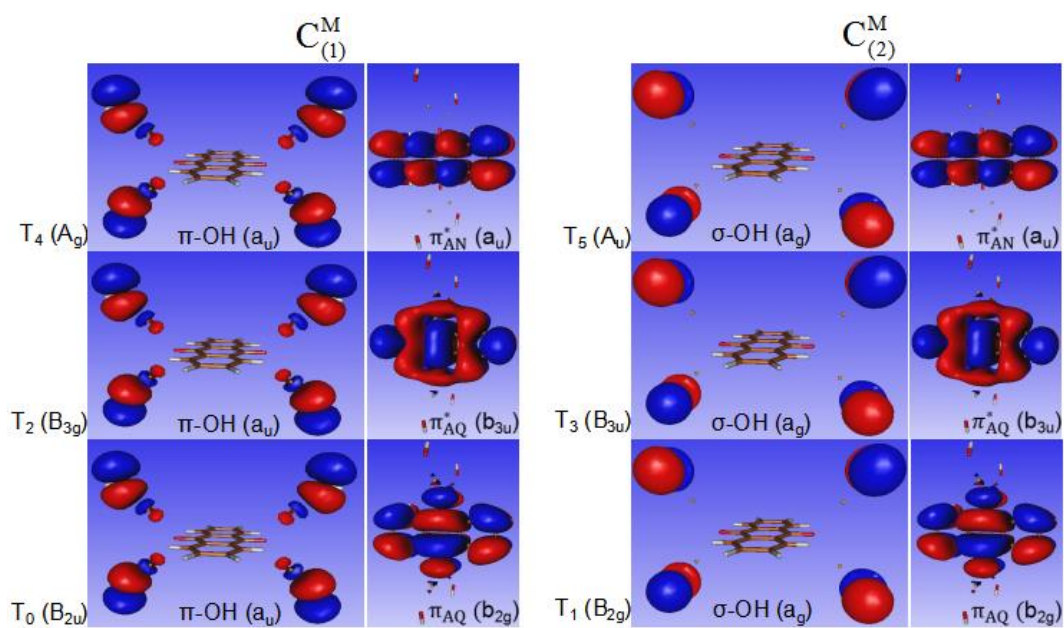

Figure S2. The single occupied molecular orbitals (SOMOs) for  $C_{(1)}^M$  and  $C_{(2)}^M$ .

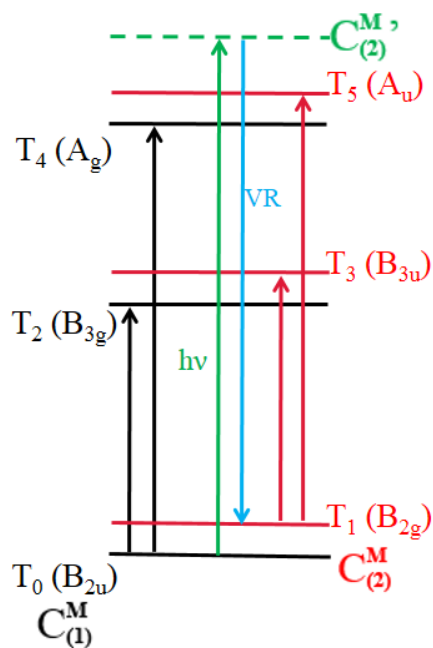

Figure S3. The excitation diagram for  $C_{(1)}^M$  (black solid) and  $C_{(2)}^M$  (red solid). The green solid represents the excited process of  $C_{(1)}^M$  with light, the blue solid is the vibrational relaxation (VR) process of  $C_{(2)}^M$ .

Cartesian Coordinates

AQ-KOtBu-triplet (PCM: DMSO) (ONIOM-1, ONIOM-2, and ONIOM-3)

|   |             |             |             |
|---|-------------|-------------|-------------|
| K | 1.32651900  | 4.19522400  | 2.04234600  |
| C | 0.48887600  | 1.37684000  | 0.00000000  |
| C | -0.93026300 | 1.08163300  | 0.00000000  |
| C | -1.86506600 | 2.13750200  | 0.00000000  |
| H | -1.49230100 | 3.15441100  | 0.00000000  |
| C | -3.21506600 | 1.88763500  | 0.00000000  |
| H | -3.92055300 | 2.71110800  | 0.00000000  |
| O | 0.91304200  | 2.57037600  | 0.00000000  |
| C | -3.68567700 | 0.56108800  | 0.00000000  |
| H | -4.75246600 | 0.36656600  | 0.00000000  |
| C | -2.79478700 | -0.48343000 | 0.00000000  |
| H | -3.14454400 | -1.50835400 | 0.00000000  |
| C | -1.40372900 | -0.25272200 | 0.00000000  |
| K | 1.32651900  | 4.19522400  | -2.04234600 |
| K | -1.32651900 | -4.19522400 | 2.04234600  |
| C | -0.48887600 | -1.37684000 | 0.00000000  |
| C | 0.93026300  | -1.08163300 | 0.00000000  |
| C | 1.86506600  | -2.13750200 | 0.00000000  |
| H | 1.49230100  | -3.15441100 | 0.00000000  |
| C | 3.21506600  | -1.88763500 | 0.00000000  |
| H | 3.92055300  | -2.71110800 | 0.00000000  |
| O | -0.91304200 | -2.57037600 | 0.00000000  |
| C | 3.68567700  | -0.56108800 | 0.00000000  |
| H | 4.75246600  | -0.36656600 | 0.00000000  |
| C | 2.79478700  | 0.48343000  | 0.00000000  |
| H | 3.14454400  | 1.50835400  | 0.00000000  |
| C | 1.40372900  | 0.25272200  | 0.00000000  |
| K | -1.32651900 | -4.19522400 | -2.04234600 |
| O | 0.31316400  | 6.44517000  | 2.24561000  |
| O | 0.31316400  | 6.44517000  | -2.24561000 |
| O | -0.31316400 | -6.44517000 | -2.24561000 |
| O | -0.31316400 | -6.44517000 | 2.24561000  |
| C | -0.20997500 | 7.61370900  | 2.75480400  |
| C | 0.65614500  | 8.82124800  | 2.35699200  |
| C | -1.64585700 | 7.83538000  | 2.24818900  |
| C | -0.24539600 | 7.52190000  | 4.29678700  |
| H | 1.67832900  | 8.68868800  | 2.72167700  |
| H | 0.69583300  | 8.90955200  | 1.26794400  |
| H | 0.26856800  | 9.76184700  | 2.76086200  |
| H | -2.28205200 | 6.99487400  | 2.53782700  |
| H | -2.08912100 | 8.75319900  | 2.64717800  |



|   |             |             |             |
|---|-------------|-------------|-------------|
| H | -1.65003400 | 7.90131400  | 1.15732500  |
| H | -0.65486000 | 8.43156300  | 4.74715000  |
| H | -0.86299300 | 6.67590700  | 4.60854800  |
| H | 0.76386200  | 7.36982500  | 4.68734300  |
| C | -0.20997500 | 7.61370900  | -2.75480400 |
| C | -1.64585700 | 7.83538000  | -2.24818900 |
| C | 0.65614500  | 8.82124800  | -2.35699200 |
| C | -0.24539600 | 7.52190000  | -4.29678700 |
| H | -2.28205200 | 6.99487400  | -2.53782700 |
| H | -1.65003400 | 7.90131400  | -1.15732500 |
| H | -2.08912100 | 8.75319900  | -2.64717800 |
| H | 1.67832900  | 8.68868800  | -2.72167700 |
| H | 0.26856800  | 9.76184700  | -2.76086200 |
| H | 0.69583300  | 8.90955200  | -1.26794400 |
| H | -0.65486000 | 8.43156300  | -4.74715000 |
| H | 0.76386200  | 7.36982500  | -4.68734300 |
| H | -0.86299300 | 6.67590700  | -4.60854800 |
| C | 0.20997500  | -7.61370900 | -2.75480400 |
| C | 1.64585700  | -7.83538000 | -2.24818900 |
| C | -0.65614500 | -8.82124800 | -2.35699200 |
| C | 0.24539600  | -7.52190000 | -4.29678700 |
| H | 2.28205200  | -6.99487400 | -2.53782700 |
| H | 1.65003400  | -7.90131400 | -1.15732500 |
| H | 2.08912100  | -8.75319900 | -2.64717800 |
| H | -1.67832900 | -8.68868800 | -2.72167700 |
| H | -0.26856800 | -9.76184700 | -2.76086200 |
| H | -0.69583300 | -8.90955200 | -1.26794400 |
| H | 0.65486000  | -8.43156300 | -4.74715000 |
| H | -0.76386200 | -7.36982500 | -4.68734300 |
| H | 0.86299300  | -6.67590700 | -4.60854800 |
| C | 0.20997500  | -7.61370900 | 2.75480400  |
| C | -0.65614500 | -8.82124800 | 2.35699200  |
| C | 1.64585700  | -7.83538000 | 2.24818900  |
| C | 0.24539600  | -7.52190000 | 4.29678700  |
| H | -1.67832900 | -8.68868800 | 2.72167700  |
| H | -0.69583300 | -8.90955200 | 1.26794400  |
| H | -0.26856800 | -9.76184700 | 2.76086200  |
| H | 2.28205200  | -6.99487400 | 2.53782700  |
| H | 2.08912100  | -8.75319900 | 2.64717800  |
| H | 1.65003400  | -7.90131400 | 1.15732500  |
| H | 0.65486000  | -8.43156300 | 4.74715000  |
| H | 0.86299300  | -6.67590700 | 4.60854800  |
| H | -0.76386200 | -7.36982500 | 4.68734300  |

## AQ-KOtBu-singlet (PCM: DMSO)

|   |             |             |             |
|---|-------------|-------------|-------------|
| K | 1.16192800  | 4.36924400  | 2.10909100  |
| C | 0.41949300  | 1.40090200  | 0.00000000  |
| C | -1.01700800 | 1.03650300  | 0.00000000  |
| C | -1.97565300 | 2.04352600  | 0.00000000  |
| H | -1.65588400 | 3.07777200  | 0.00000000  |
| C | -3.32460700 | 1.72089800  | 0.00000000  |
| H | -4.06740400 | 2.50952600  | 0.00000000  |
| O | 0.77126200  | 2.57252200  | 0.00000000  |
| C | -3.72290800 | 0.38927000  | 0.00000000  |
| H | -4.77685900 | 0.13839200  | 0.00000000  |
| C | -2.77278600 | -0.62110800 | 0.00000000  |
| H | -3.07256200 | -1.66121300 | 0.00000000  |
| C | -1.41865000 | -0.30627800 | 0.00000000  |
| K | 1.16192800  | 4.36924400  | -2.10909100 |
| K | -1.16192800 | -4.36924400 | 2.10909100  |
| C | -0.41949300 | -1.40090200 | 0.00000000  |
| C | 1.01700800  | -1.03650300 | 0.00000000  |
| C | 1.97565300  | -2.04352600 | 0.00000000  |
| H | 1.65588400  | -3.07777200 | 0.00000000  |
| C | 3.32460700  | -1.72089800 | 0.00000000  |
| H | 4.06740400  | -2.50952600 | 0.00000000  |
| O | -0.77126200 | -2.57252200 | 0.00000000  |
| C | 3.72290800  | -0.38927000 | 0.00000000  |
| H | 4.77685900  | -0.13839200 | 0.00000000  |
| C | 2.77278600  | 0.62110800  | 0.00000000  |
| H | 3.07256200  | 1.66121300  | 0.00000000  |
| C | 1.41865000  | 0.30627800  | 0.00000000  |
| K | -1.16192800 | -4.36924400 | -2.10909100 |
| O | 0.30420600  | 6.53027100  | 2.74656700  |
| O | 0.30420600  | 6.53027100  | -2.74656700 |
| O | -0.30420600 | -6.53027100 | -2.74656700 |
| O | -0.30420600 | -6.53027100 | 2.74656700  |
| C | -0.18381800 | 7.76931400  | 3.11094200  |
| C | 0.67789700  | 8.89482100  | 2.50584600  |
| C | -1.63215600 | 7.95518600  | 2.61643200  |
| C | -0.17671700 | 7.92995200  | 4.64364400  |
| H | 1.71192800  | 8.79896600  | 2.85060600  |
| H | 0.68119600  | 8.81861200  | 1.41424700  |
| H | 0.32158900  | 9.89537500  | 2.77515700  |
| H | -2.27525600 | 7.17759400  | 3.03964800  |
| H | -2.05273100 | 8.92916400  | 2.89023400  |
| H | -1.67039600 | 7.86426000  | 1.52678700  |
| H | -0.56694700 | 8.89985200  | 4.97163600  |

|   |             |             |             |
|---|-------------|-------------|-------------|
| H | -0.78580800 | 7.14616500  | 5.10404300  |
| H | 0.84354600  | 7.82903600  | 5.02573900  |
| C | -0.18381800 | 7.76931400  | -3.11094200 |
| C | -1.63215600 | 7.95518600  | -2.61643200 |
| C | 0.67789700  | 8.89482100  | -2.50584600 |
| C | -0.17671700 | 7.92995200  | -4.64364400 |
| H | -2.27525600 | 7.17759400  | -3.03964800 |
| H | -1.67039600 | 7.86426000  | -1.52678700 |
| H | -2.05273100 | 8.92916400  | -2.89023400 |
| H | 1.71192800  | 8.79896600  | -2.85060600 |
| H | 0.32158900  | 9.89537500  | -2.77515700 |
| H | 0.68119600  | 8.81861200  | -1.41424700 |
| H | -0.56694700 | 8.89985200  | -4.97163600 |
| H | 0.84354600  | 7.82903600  | -5.02573900 |
| H | -0.78580800 | 7.14616500  | -5.10404300 |
| C | 0.18381800  | -7.76931400 | -3.11094200 |
| C | 1.63215600  | -7.95518600 | -2.61643200 |
| C | -0.67789700 | -8.89482100 | -2.50584600 |
| C | 0.17671700  | -7.92995200 | -4.64364400 |
| H | 2.27525600  | -7.17759400 | -3.03964800 |
| H | 1.67039600  | -7.86426000 | -1.52678700 |
| H | 2.05273100  | -8.92916400 | -2.89023400 |
| H | -1.71192800 | -8.79896600 | -2.85060600 |
| H | -0.32158900 | -9.89537500 | -2.77515700 |
| H | -0.68119600 | -8.81861200 | -1.41424700 |
| H | 0.56694700  | -8.89985200 | -4.97163600 |
| H | -0.84354600 | -7.82903600 | -5.02573900 |
| H | 0.78580800  | -7.14616500 | -5.10404300 |
| C | 0.18381800  | -7.76931400 | 3.11094200  |
| C | -0.67789700 | -8.89482100 | 2.50584600  |
| C | 1.63215600  | -7.95518600 | 2.61643200  |
| C | 0.17671700  | -7.92995200 | 4.64364400  |
| H | -1.71192800 | -8.79896600 | 2.85060600  |
| H | -0.68119600 | -8.81861200 | 1.41424700  |
| H | -0.32158900 | -9.89537500 | 2.77515700  |
| H | 2.27525600  | -7.17759400 | 3.03964800  |
| H | 2.05273100  | -8.92916400 | 2.89023400  |
| H | 1.67039600  | -7.86426000 | 1.52678700  |
| H | 0.56694700  | -8.89985200 | 4.97163600  |
| H | 0.78580800  | -7.14616500 | 5.10404300  |
| H | -0.84354600 | -7.82903600 | 5.02573900  |

AQ-(KOTBu)<sub>n</sub>, n=0 (AQ, singlet or triplet)

|   |             |             |             |
|---|-------------|-------------|-------------|
| C | 0.48887600  | 1.37684000  | 0.00000000  |
| C | -0.93026300 | 1.08163300  | 0.00000000  |
| C | -1.86506600 | 2.13750200  | 0.00000000  |
| H | -1.49230100 | 3.15441100  | 0.00000000  |
| C | -3.21506600 | 1.88763500  | 0.00000000  |
| H | -3.92055300 | 2.71110800  | 0.00000000  |
| O | 0.91304200  | 2.57037600  | 0.00000000  |
| C | -3.68567700 | 0.56108800  | 0.00000000  |
| H | -4.75246600 | 0.36656600  | 0.00000000  |
| C | -2.79478700 | -0.48343000 | 0.00000000  |
| H | -3.14454400 | -1.50835400 | 0.00000000  |
| C | -1.40372900 | -0.25272200 | 0.00000000  |
| C | -0.48887600 | -1.37684000 | 0.00000000  |
| C | 0.93026300  | -1.08163300 | 0.00000000  |
| C | 1.86506600  | -2.13750200 | 0.00000000  |
| H | 1.49230100  | -3.15441100 | 0.00000000  |
| C | 3.21506600  | -1.88763500 | 0.00000000  |
| H | 3.92055300  | -2.71110800 | 0.00000000  |
| O | -0.91304200 | -2.57037600 | 0.00000000  |
| C | 3.68567700  | -0.56108800 | 0.00000000  |
| H | 4.75246600  | -0.36656600 | 0.00000000  |
| C | 2.79478700  | 0.48343000  | 0.00000000  |
| H | 3.14454400  | 1.50835400  | 0.00000000  |
| C | 1.40372900  | 0.25272200  | 0.00000000  |
| K | -1.32651900 | -4.19522400 | -2.04234600 |
| O | -0.31316400 | -6.44517000 | -2.24561000 |
| C | 0.20997500  | -7.61370900 | -2.75480400 |
| C | 1.64585700  | -7.83538000 | -2.24818900 |
| C | -0.65614500 | -8.82124800 | -2.35699200 |
| C | 0.24539600  | -7.52190000 | -4.29678700 |
| H | 2.28205200  | -6.99487400 | -2.53782700 |
| H | 1.65003400  | -7.90131400 | -1.15732500 |
| H | 2.08912100  | -8.75319900 | -2.64717800 |
| H | -1.67832900 | -8.68868800 | -2.72167700 |
| H | -0.26856800 | -9.76184700 | -2.76086200 |
| H | -0.69583300 | -8.90955200 | -1.26794400 |
| H | 0.65486000  | -8.43156300 | -4.74715000 |
| H | -0.76386200 | -7.36982500 | -4.68734300 |
| H | 0.86299300  | -6.67590700 | -4.60854800 |

n=1 (AQ-(KOTBu)<sub>1</sub>, singlet or triplet)

|   |             |            |            |
|---|-------------|------------|------------|
| C | 0.48887600  | 1.37684000 | 0.00000000 |
| C | -0.93026300 | 1.08163300 | 0.00000000 |

|   |             |             |             |
|---|-------------|-------------|-------------|
| C | -1.86506600 | 2.13750200  | 0.00000000  |
| H | -1.49230100 | 3.15441100  | 0.00000000  |
| C | -3.21506600 | 1.88763500  | 0.00000000  |
| H | -3.92055300 | 2.71110800  | 0.00000000  |
| O | 0.91304200  | 2.57037600  | 0.00000000  |
| C | -3.68567700 | 0.56108800  | 0.00000000  |
| H | -4.75246600 | 0.36656600  | 0.00000000  |
| C | -2.79478700 | -0.48343000 | 0.00000000  |
| H | -3.14454400 | -1.50835400 | 0.00000000  |
| C | -1.40372900 | -0.25272200 | 0.00000000  |
| C | -0.48887600 | -1.37684000 | 0.00000000  |
| C | 0.93026300  | -1.08163300 | 0.00000000  |
| C | 1.86506600  | -2.13750200 | 0.00000000  |
| H | 1.49230100  | -3.15441100 | 0.00000000  |
| C | 3.21506600  | -1.88763500 | 0.00000000  |
| H | 3.92055300  | -2.71110800 | 0.00000000  |
| O | -0.91304200 | -2.57037600 | 0.00000000  |
| C | 3.68567700  | -0.56108800 | 0.00000000  |
| H | 4.75246600  | -0.36656600 | 0.00000000  |
| C | 2.79478700  | 0.48343000  | 0.00000000  |
| H | 3.14454400  | 1.50835400  | 0.00000000  |
| C | 1.40372900  | 0.25272200  | 0.00000000  |
| K | -1.32651900 | -4.19522400 | -2.04234600 |
| O | -0.31316400 | -6.44517000 | -2.24561000 |
| C | 0.20997500  | -7.61370900 | -2.75480400 |
| C | 1.64585700  | -7.83538000 | -2.24818900 |
| C | -0.65614500 | -8.82124800 | -2.35699200 |
| C | 0.24539600  | -7.52190000 | -4.29678700 |
| H | 2.28205200  | -6.99487400 | -2.53782700 |
| H | 1.65003400  | -7.90131400 | -1.15732500 |
| H | 2.08912100  | -8.75319900 | -2.64717800 |
| H | -1.67832900 | -8.68868800 | -2.72167700 |
| H | -0.26856800 | -9.76184700 | -2.76086200 |
| H | -0.69583300 | -8.90955200 | -1.26794400 |
| H | 0.65486000  | -8.43156300 | -4.74715000 |
| H | -0.76386200 | -7.36982500 | -4.68734300 |
| H | 0.86299300  | -6.67590700 | -4.60854800 |

n=2 (AQ-(KOTu)<sub>2</sub><sup>a</sup>, singlet or triplet)

|   |             |            |            |
|---|-------------|------------|------------|
| C | 0.48887600  | 1.37684000 | 0.00000000 |
| C | -0.93026300 | 1.08163300 | 0.00000000 |
| C | -1.86506600 | 2.13750200 | 0.00000000 |
| H | -1.49230100 | 3.15441100 | 0.00000000 |

|   |             |             |             |
|---|-------------|-------------|-------------|
| C | -3.21506600 | 1.88763500  | 0.00000000  |
| H | -3.92055300 | 2.71110800  | 0.00000000  |
| O | 0.91304200  | 2.57037600  | 0.00000000  |
| C | -3.68567700 | 0.56108800  | 0.00000000  |
| H | -4.75246600 | 0.36656600  | 0.00000000  |
| C | -2.79478700 | -0.48343000 | 0.00000000  |
| H | -3.14454400 | -1.50835400 | 0.00000000  |
| C | -1.40372900 | -0.25272200 | 0.00000000  |
| K | -1.32651900 | -4.19522400 | 2.04234600  |
| C | -0.48887600 | -1.37684000 | 0.00000000  |
| C | 0.93026300  | -1.08163300 | 0.00000000  |
| C | 1.86506600  | -2.13750200 | 0.00000000  |
| H | 1.49230100  | -3.15441100 | 0.00000000  |
| C | 3.21506600  | -1.88763500 | 0.00000000  |
| H | 3.92055300  | -2.71110800 | 0.00000000  |
| O | -0.91304200 | -2.57037600 | 0.00000000  |
| C | 3.68567700  | -0.56108800 | 0.00000000  |
| H | 4.75246600  | -0.36656600 | 0.00000000  |
| C | 2.79478700  | 0.48343000  | 0.00000000  |
| H | 3.14454400  | 1.50835400  | 0.00000000  |
| C | 1.40372900  | 0.25272200  | 0.00000000  |
| K | -1.32651900 | -4.19522400 | -2.04234600 |
| O | -0.31316400 | -6.44517000 | -2.24561000 |
| O | -0.31316400 | -6.44517000 | 2.24561000  |
| C | 0.20997500  | -7.61370900 | -2.75480400 |
| C | 1.64585700  | -7.83538000 | -2.24818900 |
| C | -0.65614500 | -8.82124800 | -2.35699200 |
| C | 0.24539600  | -7.52190000 | -4.29678700 |
| H | 2.28205200  | -6.99487400 | -2.53782700 |
| H | 1.65003400  | -7.90131400 | -1.15732500 |
| H | 2.08912100  | -8.75319900 | -2.64717800 |
| H | -1.67832900 | -8.68868800 | -2.72167700 |
| H | -0.26856800 | -9.76184700 | -2.76086200 |
| H | -0.69583300 | -8.90955200 | -1.26794400 |
| H | 0.65486000  | -8.43156300 | -4.74715000 |
| H | -0.76386200 | -7.36982500 | -4.68734300 |
| H | 0.86299300  | -6.67590700 | -4.60854800 |
| C | 0.20997500  | -7.61370900 | 2.75480400  |
| C | -0.65614500 | -8.82124800 | 2.35699200  |
| C | 1.64585700  | -7.83538000 | 2.24818900  |
| C | 0.24539600  | -7.52190000 | 4.29678700  |
| H | -1.67832900 | -8.68868800 | 2.72167700  |
| H | -0.69583300 | -8.90955200 | 1.26794400  |
| H | -0.26856800 | -9.76184700 | 2.76086200  |

|   |             |             |            |
|---|-------------|-------------|------------|
| H | 2.28205200  | -6.99487400 | 2.53782700 |
| H | 2.08912100  | -8.75319900 | 2.64717800 |
| H | 1.65003400  | -7.90131400 | 1.15732500 |
| H | 0.65486000  | -8.43156300 | 4.74715000 |
| H | 0.86299300  | -6.67590700 | 4.60854800 |
| H | -0.76386200 | -7.36982500 | 4.68734300 |

n=2 (AQ-(KOTu)<sub>2</sub><sup>b</sup>, singlet or triplet)

|   |             |             |             |
|---|-------------|-------------|-------------|
| C | 0.48887600  | 1.37684000  | 0.00000000  |
| C | -0.93026300 | 1.08163300  | 0.00000000  |
| C | -1.86506600 | 2.13750200  | 0.00000000  |
| H | -1.49230100 | 3.15441100  | 0.00000000  |
| C | -3.21506600 | 1.88763500  | 0.00000000  |
| H | -3.92055300 | 2.71110800  | 0.00000000  |
| O | 0.91304200  | 2.57037600  | 0.00000000  |
| C | -3.68567700 | 0.56108800  | 0.00000000  |
| H | -4.75246600 | 0.36656600  | 0.00000000  |
| C | -2.79478700 | -0.48343000 | 0.00000000  |
| H | -3.14454400 | -1.50835400 | 0.00000000  |
| C | -1.40372900 | -0.25272200 | 0.00000000  |
| K | 1.32651900  | 4.19522400  | -2.04234600 |
| C | -0.48887600 | -1.37684000 | 0.00000000  |
| C | 0.93026300  | -1.08163300 | 0.00000000  |
| C | 1.86506600  | -2.13750200 | 0.00000000  |
| H | 1.49230100  | -3.15441100 | 0.00000000  |
| C | 3.21506600  | -1.88763500 | 0.00000000  |
| H | 3.92055300  | -2.71110800 | 0.00000000  |
| O | -0.91304200 | -2.57037600 | 0.00000000  |
| C | 3.68567700  | -0.56108800 | 0.00000000  |
| H | 4.75246600  | -0.36656600 | 0.00000000  |
| C | 2.79478700  | 0.48343000  | 0.00000000  |
| H | 3.14454400  | 1.50835400  | 0.00000000  |
| C | 1.40372900  | 0.25272200  | 0.00000000  |
| K | -1.32651900 | -4.19522400 | -2.04234600 |
| O | 0.31316400  | 6.44517000  | -2.24561000 |
| O | -0.31316400 | -6.44517000 | -2.24561000 |
| C | -0.20997500 | 7.61370900  | -2.75480400 |
| C | -1.64585700 | 7.83538000  | -2.24818900 |
| C | 0.65614500  | 8.82124800  | -2.35699200 |
| C | -0.24539600 | 7.52190000  | -4.29678700 |
| H | -2.28205200 | 6.99487400  | -2.53782700 |
| H | -1.65003400 | 7.90131400  | -1.15732500 |
| H | -2.08912100 | 8.75319900  | -2.64717800 |

|   |             |             |             |
|---|-------------|-------------|-------------|
| H | 1.67832900  | 8.68868800  | -2.72167700 |
| H | 0.26856800  | 9.76184700  | -2.76086200 |
| H | 0.69583300  | 8.90955200  | -1.26794400 |
| H | -0.65486000 | 8.43156300  | -4.74715000 |
| H | 0.76386200  | 7.36982500  | -4.68734300 |
| H | -0.86299300 | 6.67590700  | -4.60854800 |
| C | 0.20997500  | -7.61370900 | -2.75480400 |
| C | 1.64585700  | -7.83538000 | -2.24818900 |
| C | -0.65614500 | -8.82124800 | -2.35699200 |
| C | 0.24539600  | -7.52190000 | -4.29678700 |
| H | 2.28205200  | -6.99487400 | -2.53782700 |
| H | 1.65003400  | -7.90131400 | -1.15732500 |
| H | 2.08912100  | -8.75319900 | -2.64717800 |
| H | -1.67832900 | -8.68868800 | -2.72167700 |
| H | -0.26856800 | -9.76184700 | -2.76086200 |
| H | -0.69583300 | -8.90955200 | -1.26794400 |
| H | 0.65486000  | -8.43156300 | -4.74715000 |
| H | -0.76386200 | -7.36982500 | -4.68734300 |
| H | 0.86299300  | -6.67590700 | -4.60854800 |

n=2 (AQ-(KOtBu)<sub>2</sub>)<sup>c</sup>, singlet or triplet)

|   |             |             |            |
|---|-------------|-------------|------------|
| K | 1.32651900  | 4.19522400  | 2.04234600 |
| C | 0.48887600  | 1.37684000  | 0.00000000 |
| C | -0.93026300 | 1.08163300  | 0.00000000 |
| C | -1.86506600 | 2.13750200  | 0.00000000 |
| H | -1.49230100 | 3.15441100  | 0.00000000 |
| C | -3.21506600 | 1.88763500  | 0.00000000 |
| H | -3.92055300 | 2.71110800  | 0.00000000 |
| O | 0.91304200  | 2.57037600  | 0.00000000 |
| C | -3.68567700 | 0.56108800  | 0.00000000 |
| H | -4.75246600 | 0.36656600  | 0.00000000 |
| C | -2.79478700 | -0.48343000 | 0.00000000 |
| H | -3.14454400 | -1.50835400 | 0.00000000 |
| C | -1.40372900 | -0.25272200 | 0.00000000 |
| C | -0.48887600 | -1.37684000 | 0.00000000 |
| C | 0.93026300  | -1.08163300 | 0.00000000 |
| C | 1.86506600  | -2.13750200 | 0.00000000 |
| H | 1.49230100  | -3.15441100 | 0.00000000 |
| C | 3.21506600  | -1.88763500 | 0.00000000 |
| H | 3.92055300  | -2.71110800 | 0.00000000 |
| O | -0.91304200 | -2.57037600 | 0.00000000 |
| C | 3.68567700  | -0.56108800 | 0.00000000 |
| H | 4.75246600  | -0.36656600 | 0.00000000 |



|   |             |             |             |
|---|-------------|-------------|-------------|
| C | 2.79478700  | 0.48343000  | 0.00000000  |
| H | 3.14454400  | 1.50835400  | 0.00000000  |
| C | 1.40372900  | 0.25272200  | 0.00000000  |
| K | -1.32651900 | -4.19522400 | -2.04234600 |
| O | 0.31316400  | 6.44517000  | 2.24561000  |
| O | -0.31316400 | -6.44517000 | -2.24561000 |
| C | -0.20997500 | 7.61370900  | 2.75480400  |
| C | 0.65614500  | 8.82124800  | 2.35699200  |
| C | -1.64585700 | 7.83538000  | 2.24818900  |
| C | -0.24539600 | 7.52190000  | 4.29678700  |
| H | 1.67832900  | 8.68868800  | 2.72167700  |
| H | 0.69583300  | 8.90955200  | 1.26794400  |
| H | 0.26856800  | 9.76184700  | 2.76086200  |
| H | -2.28205200 | 6.99487400  | 2.53782700  |
| H | -2.08912100 | 8.75319900  | 2.64717800  |
| H | -1.65003400 | 7.90131400  | 1.15732500  |
| H | -0.65486000 | 8.43156300  | 4.74715000  |
| H | -0.86299300 | 6.67590700  | 4.60854800  |
| H | 0.76386200  | 7.36982500  | 4.68734300  |
| C | 0.20997500  | -7.61370900 | -2.75480400 |
| C | 1.64585700  | -7.83538000 | -2.24818900 |
| C | -0.65614500 | -8.82124800 | -2.35699200 |
| C | 0.24539600  | -7.52190000 | -4.29678700 |
| H | 2.28205200  | -6.99487400 | -2.53782700 |
| H | 1.65003400  | -7.90131400 | -1.15732500 |
| H | 2.08912100  | -8.75319900 | -2.64717800 |
| H | -1.67832900 | -8.68868800 | -2.72167700 |
| H | -0.26856800 | -9.76184700 | -2.76086200 |
| H | -0.69583300 | -8.90955200 | -1.26794400 |
| H | 0.65486000  | -8.43156300 | -4.74715000 |
| H | -0.76386200 | -7.36982500 | -4.68734300 |
| H | 0.86299300  | -6.67590700 | -4.60854800 |

n=3 (AQ-(KOBu)<sub>3</sub>, singlet or triplet)

|   |             |            |            |
|---|-------------|------------|------------|
| K | 1.32651900  | 4.19522400 | 2.04234600 |
| C | 0.48887600  | 1.37684000 | 0.00000000 |
| C | -0.93026300 | 1.08163300 | 0.00000000 |
| C | -1.86506600 | 2.13750200 | 0.00000000 |
| H | -1.49230100 | 3.15441100 | 0.00000000 |
| C | -3.21506600 | 1.88763500 | 0.00000000 |
| H | -3.92055300 | 2.71110800 | 0.00000000 |
| O | 0.91304200  | 2.57037600 | 0.00000000 |
| C | -3.68567700 | 0.56108800 | 0.00000000 |

|   |             |             |             |
|---|-------------|-------------|-------------|
| H | -4.75246600 | 0.36656600  | 0.00000000  |
| C | -2.79478700 | -0.48343000 | 0.00000000  |
| H | -3.14454400 | -1.50835400 | 0.00000000  |
| C | -1.40372900 | -0.25272200 | 0.00000000  |
| K | -1.32651900 | -4.19522400 | 2.04234600  |
| C | -0.48887600 | -1.37684000 | 0.00000000  |
| C | 0.93026300  | -1.08163300 | 0.00000000  |
| C | 1.86506600  | -2.13750200 | 0.00000000  |
| H | 1.49230100  | -3.15441100 | 0.00000000  |
| C | 3.21506600  | -1.88763500 | 0.00000000  |
| H | 3.92055300  | -2.71110800 | 0.00000000  |
| O | -0.91304200 | -2.57037600 | 0.00000000  |
| C | 3.68567700  | -0.56108800 | 0.00000000  |
| H | 4.75246600  | -0.36656600 | 0.00000000  |
| C | 2.79478700  | 0.48343000  | 0.00000000  |
| H | 3.14454400  | 1.50835400  | 0.00000000  |
| C | 1.40372900  | 0.25272200  | 0.00000000  |
| K | -1.32651900 | -4.19522400 | -2.04234600 |
| O | 0.31316400  | 6.44517000  | 2.24561000  |
| O | -0.31316400 | -6.44517000 | -2.24561000 |
| O | -0.31316400 | -6.44517000 | 2.24561000  |
| C | -0.20997500 | 7.61370900  | 2.75480400  |
| C | 0.65614500  | 8.82124800  | 2.35699200  |
| C | -1.64585700 | 7.83538000  | 2.24818900  |
| C | -0.24539600 | 7.52190000  | 4.29678700  |
| H | 1.67832900  | 8.68868800  | 2.72167700  |
| H | 0.69583300  | 8.90955200  | 1.26794400  |
| H | 0.26856800  | 9.76184700  | 2.76086200  |
| H | -2.28205200 | 6.99487400  | 2.53782700  |
| H | -2.08912100 | 8.75319900  | 2.64717800  |
| H | -1.65003400 | 7.90131400  | 1.15732500  |
| H | -0.65486000 | 8.43156300  | 4.74715000  |
| H | -0.86299300 | 6.67590700  | 4.60854800  |
| H | 0.76386200  | 7.36982500  | 4.68734300  |
| C | 0.20997500  | -7.61370900 | -2.75480400 |
| C | 1.64585700  | -7.83538000 | -2.24818900 |
| C | -0.65614500 | -8.82124800 | -2.35699200 |
| C | 0.24539600  | -7.52190000 | -4.29678700 |
| H | 2.28205200  | -6.99487400 | -2.53782700 |
| H | 1.65003400  | -7.90131400 | -1.15732500 |
| H | 2.08912100  | -8.75319900 | -2.64717800 |
| H | -1.67832900 | -8.68868800 | -2.72167700 |
| H | -0.26856800 | -9.76184700 | -2.76086200 |
| H | -0.69583300 | -8.90955200 | -1.26794400 |

|   |             |             |             |
|---|-------------|-------------|-------------|
| H | 0.65486000  | -8.43156300 | -4.74715000 |
| H | -0.76386200 | -7.36982500 | -4.68734300 |
| H | 0.86299300  | -6.67590700 | -4.60854800 |
| C | 0.20997500  | -7.61370900 | 2.75480400  |
| C | -0.65614500 | -8.82124800 | 2.35699200  |
| C | 1.64585700  | -7.83538000 | 2.24818900  |
| C | 0.24539600  | -7.52190000 | 4.29678700  |
| H | -1.67832900 | -8.68868800 | 2.72167700  |
| H | -0.69583300 | -8.90955200 | 1.26794400  |
| H | -0.26856800 | -9.76184700 | 2.76086200  |
| H | 2.28205200  | -6.99487400 | 2.53782700  |
| H | 2.08912100  | -8.75319900 | 2.64717800  |
| H | 1.65003400  | -7.90131400 | 1.15732500  |
| H | 0.65486000  | -8.43156300 | 4.74715000  |
| H | 0.86299300  | -6.67590700 | 4.60854800  |
| H | -0.76386200 | -7.36982500 | 4.68734300  |

n=4 (AQ-KOtBu/AQ-(KOtBu)<sub>4</sub>, singlet or triplet)

|   |             |             |             |
|---|-------------|-------------|-------------|
| K | 1.32651900  | 4.19522400  | 2.04234600  |
| C | 0.48887600  | 1.37684000  | 0.00000000  |
| C | -0.93026300 | 1.08163300  | 0.00000000  |
| C | -1.86506600 | 2.13750200  | 0.00000000  |
| H | -1.49230100 | 3.15441100  | 0.00000000  |
| C | -3.21506600 | 1.88763500  | 0.00000000  |
| H | -3.92055300 | 2.71110800  | 0.00000000  |
| O | 0.91304200  | 2.57037600  | 0.00000000  |
| C | -3.68567700 | 0.56108800  | 0.00000000  |
| H | -4.75246600 | 0.36656600  | 0.00000000  |
| C | -2.79478700 | -0.48343000 | 0.00000000  |
| H | -3.14454400 | -1.50835400 | 0.00000000  |
| C | -1.40372900 | -0.25272200 | 0.00000000  |
| K | 1.32651900  | 4.19522400  | -2.04234600 |
| K | -1.32651900 | -4.19522400 | 2.04234600  |
| C | -0.48887600 | -1.37684000 | 0.00000000  |
| C | 0.93026300  | -1.08163300 | 0.00000000  |
| C | 1.86506600  | -2.13750200 | 0.00000000  |
| H | 1.49230100  | -3.15441100 | 0.00000000  |
| C | 3.21506600  | -1.88763500 | 0.00000000  |
| H | 3.92055300  | -2.71110800 | 0.00000000  |
| O | -0.91304200 | -2.57037600 | 0.00000000  |
| C | 3.68567700  | -0.56108800 | 0.00000000  |
| H | 4.75246600  | -0.36656600 | 0.00000000  |
| C | 2.79478700  | 0.48343000  | 0.00000000  |

|   |             |             |             |
|---|-------------|-------------|-------------|
| H | 3.14454400  | 1.50835400  | 0.00000000  |
| C | 1.40372900  | 0.25272200  | 0.00000000  |
| K | -1.32651900 | -4.19522400 | -2.04234600 |
| O | 0.31316400  | 6.44517000  | 2.24561000  |
| O | 0.31316400  | 6.44517000  | -2.24561000 |
| O | -0.31316400 | -6.44517000 | -2.24561000 |
| O | -0.31316400 | -6.44517000 | 2.24561000  |
| C | -0.20997500 | 7.61370900  | 2.75480400  |
| C | 0.65614500  | 8.82124800  | 2.35699200  |
| C | -1.64585700 | 7.83538000  | 2.24818900  |
| C | -0.24539600 | 7.52190000  | 4.29678700  |
| H | 1.67832900  | 8.68868800  | 2.72167700  |
| H | 0.69583300  | 8.90955200  | 1.26794400  |
| H | 0.26856800  | 9.76184700  | 2.76086200  |
| H | -2.28205200 | 6.99487400  | 2.53782700  |
| H | -2.08912100 | 8.75319900  | 2.64717800  |
| H | -1.65003400 | 7.90131400  | 1.15732500  |
| H | -0.65486000 | 8.43156300  | 4.74715000  |
| H | -0.86299300 | 6.67590700  | 4.60854800  |
| H | 0.76386200  | 7.36982500  | 4.68734300  |
| C | -0.20997500 | 7.61370900  | -2.75480400 |
| C | -1.64585700 | 7.83538000  | -2.24818900 |
| C | 0.65614500  | 8.82124800  | -2.35699200 |
| C | -0.24539600 | 7.52190000  | -4.29678700 |
| H | -2.28205200 | 6.99487400  | -2.53782700 |
| H | -1.65003400 | 7.90131400  | -1.15732500 |
| H | -2.08912100 | 8.75319900  | -2.64717800 |
| H | 1.67832900  | 8.68868800  | -2.72167700 |
| H | 0.26856800  | 9.76184700  | -2.76086200 |
| H | 0.69583300  | 8.90955200  | -1.26794400 |
| H | -0.65486000 | 8.43156300  | -4.74715000 |
| H | 0.76386200  | 7.36982500  | -4.68734300 |
| H | -0.86299300 | 6.67590700  | -4.60854800 |
| C | 0.20997500  | -7.61370900 | -2.75480400 |
| C | 1.64585700  | -7.83538000 | -2.24818900 |
| C | -0.65614500 | -8.82124800 | -2.35699200 |
| C | 0.24539600  | -7.52190000 | -4.29678700 |
| H | 2.28205200  | -6.99487400 | -2.53782700 |
| H | 1.65003400  | -7.90131400 | -1.15732500 |
| H | 2.08912100  | -8.75319900 | -2.64717800 |
| H | -1.67832900 | -8.68868800 | -2.72167700 |
| H | -0.26856800 | -9.76184700 | -2.76086200 |
| H | -0.69583300 | -8.90955200 | -1.26794400 |
| H | 0.65486000  | -8.43156300 | -4.74715000 |

|   |             |             |             |
|---|-------------|-------------|-------------|
| H | -0.76386200 | -7.36982500 | -4.68734300 |
| H | 0.86299300  | -6.67590700 | -4.60854800 |
| C | 0.20997500  | -7.61370900 | 2.75480400  |
| C | -0.65614500 | -8.82124800 | 2.35699200  |
| C | 1.64585700  | -7.83538000 | 2.24818900  |
| C | 0.24539600  | -7.52190000 | 4.29678700  |
| H | -1.67832900 | -8.68868800 | 2.72167700  |
| H | -0.69583300 | -8.90955200 | 1.26794400  |
| H | -0.26856800 | -9.76184700 | 2.76086200  |
| H | 2.28205200  | -6.99487400 | 2.53782700  |
| H | 2.08912100  | -8.75319900 | 2.64717800  |
| H | 1.65003400  | -7.90131400 | 1.15732500  |
| H | 0.65486000  | -8.43156300 | 4.74715000  |
| H | 0.86299300  | -6.67590700 | 4.60854800  |
| H | -0.76386200 | -7.36982500 | 4.68734300  |

KOtBu

|   |             |            |             |
|---|-------------|------------|-------------|
| K | 1.32651900  | 4.19522400 | -2.04234600 |
| O | 0.31316400  | 6.44517000 | -2.24561000 |
| C | -0.20997500 | 7.61370900 | -2.75480400 |
| C | -1.64585700 | 7.83538000 | -2.24818900 |
| C | 0.65614500  | 8.82124800 | -2.35699200 |
| C | -0.24539600 | 7.52190000 | -4.29678700 |
| H | -2.28205200 | 6.99487400 | -2.53782700 |
| H | -1.65003400 | 7.90131400 | -1.15732500 |
| H | -2.08912100 | 8.75319900 | -2.64717800 |
| H | 1.67832900  | 8.68868800 | -2.72167700 |
| H | 0.26856800  | 9.76184700 | -2.76086200 |
| H | 0.69583300  | 8.90955200 | -1.26794400 |
| H | -0.65486000 | 8.43156300 | -4.74715000 |
| H | 0.76386200  | 7.36982500 | -4.68734300 |
| H | -0.86299300 | 6.67590700 | -4.60854800 |

C<sup>M</sup>

|   |             |             |            |
|---|-------------|-------------|------------|
| K | 2.04818183  | 0.00000000  | 4.39722172 |
| C | -0.00000000 | 0.00000000  | 1.46105712 |
| C | 0.00000000  | -1.23878279 | 0.70762729 |
| C | 0.00000000  | -2.47321505 | 1.38945792 |
| H | 0.00000000  | -2.46253894 | 2.47248316 |
| C | 0.00000000  | -3.66157689 | 0.70190454 |
| H | 0.00000000  | -4.60210584 | 1.24155717 |
| O | -0.00000000 | 0.00000000  | 2.72772400 |

|   |             |             |             |
|---|-------------|-------------|-------------|
| C | 0.00000000  | -3.66157689 | -0.70190454 |
| H | 0.00000000  | -4.60210584 | -1.24155717 |
| C | 0.00000000  | -2.47321505 | -1.38945792 |
| H | 0.00000000  | -2.46253894 | -2.47248316 |
| C | 0.00000000  | -1.23878279 | -0.70762729 |
| K | -2.04818183 | -0.00000000 | 4.39722172  |
| K | 2.04818183  | 0.00000000  | -4.39722172 |
| C | -0.00000000 | 0.00000000  | -1.46105712 |
| C | 0.00000000  | 1.23878279  | -0.70762729 |
| C | 0.00000000  | 2.47321505  | -1.38945792 |
| H | 0.00000000  | 2.46253894  | -2.47248316 |
| C | 0.00000000  | 3.66157689  | -0.70190454 |
| H | 0.00000000  | 4.60210584  | -1.24155717 |
| O | -0.00000000 | 0.00000000  | -2.72772400 |
| C | -0.00000000 | 3.66157689  | 0.70190454  |
| H | -0.00000000 | 4.60210584  | 1.24155717  |
| C | -0.00000000 | 2.47321505  | 1.38945792  |
| H | -0.00000000 | 2.46253894  | 2.47248316  |
| C | -0.00000000 | 1.23878279  | 0.70762729  |
| K | -2.04818183 | -0.00000000 | -4.39722172 |
| O | 3.96738425  | 0.00000000  | -5.96158678 |
| H | 3.64402691  | -0.00000012 | -6.86548945 |
| O | -3.96738425 | -0.00000000 | -5.96158678 |
| H | -3.64402691 | -0.00000012 | -6.86548945 |
| O | -3.96738425 | -0.00000000 | 5.96158678  |
| H | -3.64402691 | -0.00000012 | 6.86548945  |
| O | 3.96738425  | 0.00000000  | 5.96158678  |
| H | 3.64402691  | -0.00000012 | 6.86548945  |

The OtBu radical (D<sub>0</sub>)

|   |             |             |             |
|---|-------------|-------------|-------------|
| O | 0.00000000  | 0.25884100  | 1.42557100  |
| C | 0.00000000  | -0.02498000 | 0.07603000  |
| C | 0.00000000  | 1.38001500  | -0.57341700 |
| C | -1.26861800 | -0.78755100 | -0.31328800 |
| C | 1.26861800  | -0.78755100 | -0.31328800 |
| H | 0.88712700  | 1.94145800  | -0.28077800 |
| H | -0.88712700 | 1.94145800  | -0.28077800 |
| H | 0.00000000  | 1.26012200  | -1.65851000 |
| H | -1.30050900 | -1.75412200 | 0.19356900  |
| H | -1.30381700 | -0.96953900 | -1.38990500 |
| H | -2.15603400 | -0.22302300 | -0.02402500 |
| H | 1.30381700  | -0.96953900 | -1.38990500 |
| H | 1.30050900  | -1.75412200 | 0.19356900  |

|   |            |             |             |
|---|------------|-------------|-------------|
| H | 2.15603400 | -0.22302300 | -0.02402500 |
|---|------------|-------------|-------------|

The OtBu radical (the lowest second excited state, D<sub>2</sub>)

|   |             |             |             |
|---|-------------|-------------|-------------|
| O | 0.14958100  | 1.46742000  | 0.00000000  |
| C | 0.14604100  | 0.09927600  | 0.00000000  |
| C | -1.60048600 | -0.31469000 | 0.00000000  |
| C | 0.66679800  | -0.50309700 | 1.26097100  |
| C | 0.66679800  | -0.50309700 | -1.26097100 |
| H | -1.76093000 | 0.24703600  | -0.92165800 |
| H | -1.76093000 | 0.24703600  | 0.92165800  |
| H | -2.07949200 | -1.29442400 | 0.00000000  |
| H | 1.69154900  | -0.08851800 | 1.33469500  |
| H | 0.73003800  | -1.59334000 | 1.27257200  |
| H | 0.14331000  | -0.12282100 | 2.13744200  |
| H | 0.73003800  | -1.59334000 | -1.27257200 |
| H | 1.69154900  | -0.08851800 | -1.33469500 |
| H | 0.14331000  | -0.12282100 | -2.13744200 |

The OtBu radical (D<sub>1</sub>)

|   |             |             |             |
|---|-------------|-------------|-------------|
| O | 1.55776400  | -0.00302300 | 0.00000000  |
| C | -0.10031200 | -0.00062500 | 0.00000000  |
| C | -0.40687700 | 1.46260300  | 0.00000000  |
| C | -0.40687700 | -0.73013400 | 1.26755200  |
| C | -0.40687700 | -0.73013400 | -1.26755200 |
| H | -0.00581100 | 1.94676600  | -0.88763400 |
| H | -0.00581100 | 1.94676600  | 0.88763400  |
| H | -1.49923600 | 1.58600000  | 0.00000000  |
| H | -0.01390300 | -1.74397000 | 1.24234300  |
| H | -1.49940000 | -0.78286300 | 1.37867700  |
| H | 0.00051000  | -0.20596800 | 2.12931700  |
| H | -1.49940000 | -0.78286300 | -1.37867700 |
| H | -0.01390300 | -1.74397000 | -1.24234300 |
| H | 0.00051000  | -0.20596800 | -2.12931700 |

The complex, C<sub>(1)</sub>, catalyzing triplet oxygen to generate singlet oxygen.

C<sub>(1)</sub>

|   |             |            |            |
|---|-------------|------------|------------|
| K | 1.74529700  | 3.56776900 | 2.23210600 |
| C | 0.86416900  | 1.17150300 | 0.00000000 |
| C | -0.57783200 | 1.30810300 | 0.00000000 |
| C | -1.17059700 | 2.58794500 | 0.00000000 |
| H | -0.54108800 | 3.46949200 | 0.00000000 |
| C | -2.53530100 | 2.73493000 | 0.00000000 |

|   |             |             |             |
|---|-------------|-------------|-------------|
| H | -2.96759500 | 3.72859900  | 0.00000000  |
| O | 1.62337900  | 2.19546500  | 0.00000000  |
| C | -3.36529600 | 1.60172300  | 0.00000000  |
| H | -4.44283100 | 1.72291100  | 0.00000000  |
| C | -2.81352300 | 0.34448600  | 0.00000000  |
| H | -3.44155400 | -0.53780700 | 0.00000000  |
| C | -1.41639900 | 0.16568200  | 0.00000000  |
| K | 1.74529700  | 3.56776900  | -2.23210600 |
| K | -1.74529700 | -3.56776900 | 2.23210600  |
| C | -0.86416900 | -1.17150300 | 0.00000000  |
| C | 0.57783200  | -1.30810300 | 0.00000000  |
| C | 1.17059700  | -2.58794500 | 0.00000000  |
| H | 0.54108800  | -3.46949200 | 0.00000000  |
| C | 2.53530100  | -2.73493000 | 0.00000000  |
| H | 2.96759500  | -3.72859900 | 0.00000000  |
| O | -1.62337900 | -2.19546500 | 0.00000000  |
| C | 3.36529600  | -1.60172300 | 0.00000000  |
| H | 4.44283100  | -1.72291100 | 0.00000000  |
| C | 2.81352300  | -0.34448600 | 0.00000000  |
| H | 3.44155400  | 0.53780700  | 0.00000000  |
| C | 1.41639900  | -0.16568200 | 0.00000000  |
| K | -1.74529700 | -3.56776900 | -2.23210600 |
| O | 0.50409900  | 5.47345300  | 2.68970700  |
| O | 0.50409900  | 5.47345300  | -2.68970700 |
| O | -0.50409900 | -5.47345300 | -2.68970700 |
| O | -0.50409900 | -5.47345300 | 2.68970700  |
| C | -0.23067500 | 6.60278700  | 2.96047900  |
| C | 0.47912000  | 7.84807200  | 2.40589100  |
| C | -1.63220300 | 6.48816600  | 2.33861500  |
| C | -0.37555000 | 6.74974100  | 4.49070300  |
| H | 1.47457000  | 7.93736200  | 2.84820600  |
| H | 0.59779600  | 7.75620600  | 1.32353800  |
| H | -0.07362600 | 8.76975800  | 2.61280700  |
| H | -2.13901700 | 5.60071200  | 2.72642100  |
| H | -2.25521300 | 7.36275600  | 2.55027300  |
| H | -1.54739000 | 6.38453700  | 1.25397800  |
| H | -0.95532500 | 7.63822900  | 4.75949900  |
| H | -0.87669800 | 5.87094400  | 4.90328100  |
| H | 0.61165900  | 6.82810500  | 4.95195100  |
| C | -0.23067500 | 6.60278700  | -2.96047900 |
| C | -1.63220300 | 6.48816600  | -2.33861500 |
| C | 0.47912000  | 7.84807200  | -2.40589100 |
| C | -0.37555000 | 6.74974100  | -4.49070300 |
| H | -2.13901700 | 5.60071200  | -2.72642100 |



|   |             |             |             |
|---|-------------|-------------|-------------|
| H | -1.54739000 | 6.38453700  | -1.25397800 |
| H | -2.25521300 | 7.36275600  | -2.55027300 |
| H | 1.47457000  | 7.93736200  | -2.84820600 |
| H | -0.07362600 | 8.76975800  | -2.61280700 |
| H | 0.59779600  | 7.75620600  | -1.32353800 |
| H | -0.95532500 | 7.63822900  | -4.75949900 |
| H | 0.61165900  | 6.82810500  | -4.95195100 |
| H | -0.87669800 | 5.87094400  | -4.90328100 |
| C | 0.23067500  | -6.60278700 | -2.96047900 |
| C | 1.63220300  | -6.48816600 | -2.33861500 |
| C | -0.47912000 | -7.84807200 | -2.40589100 |
| C | 0.37555000  | -6.74974100 | -4.49070300 |
| H | 2.13901700  | -5.60071200 | -2.72642100 |
| H | 1.54739000  | -6.38453700 | -1.25397800 |
| H | 2.25521300  | -7.36275600 | -2.55027300 |
| H | -1.47457000 | -7.93736200 | -2.84820600 |
| H | 0.07362600  | -8.76975800 | -2.61280700 |
| H | -0.59779600 | -7.75620600 | -1.32353800 |
| H | 0.95532500  | -7.63822900 | -4.75949900 |
| H | -0.61165900 | -6.82810500 | -4.95195100 |
| H | 0.87669800  | -5.87094400 | -4.90328100 |
| C | 0.23067500  | -6.60278700 | 2.96047900  |
| C | -0.47912000 | -7.84807200 | 2.40589100  |
| C | 1.63220300  | -6.48816600 | 2.33861500  |
| C | 0.37555000  | -6.74974100 | 4.49070300  |
| H | -1.47457000 | -7.93736200 | 2.84820600  |
| H | -0.59779600 | -7.75620600 | 1.32353800  |
| H | 0.07362600  | -8.76975800 | 2.61280700  |
| H | 2.13901700  | -5.60071200 | 2.72642100  |
| H | 2.25521300  | -7.36275600 | 2.55027300  |
| H | 1.54739000  | -6.38453700 | 1.25397800  |
| H | 0.95532500  | -7.63822900 | 4.75949900  |
| H | 0.87669800  | -5.87094400 | 4.90328100  |
| H | -0.61165900 | -6.82810500 | 4.95195100  |

C<sub>(1)</sub>@<sup>1</sup>O<sub>2</sub>

|   |            |             |             |
|---|------------|-------------|-------------|
| K | 1.95953373 | 4.08710968  | -0.39541897 |
| C | 0.78929674 | 1.23304591  | -2.23307197 |
| C | 1.44641269 | -0.09765301 | -2.24640997 |
| C | 2.83447536 | -0.16372977 | -2.26110097 |
| H | 3.39889972 | 0.75895934  | -2.29863897 |
| C | 3.47328512 | -1.39230614 | -2.21567097 |
| H | 4.55643403 | -1.43884736 | -2.22603397 |
| O | 1.45134278 | 2.25672683  | -2.24661297 |

|   |             |             |             |
|---|-------------|-------------|-------------|
| C | 2.72621009  | -2.56201832 | -2.13886797 |
| H | 3.21986493  | -3.52488115 | -2.07948897 |
| C | 1.34048572  | -2.50821349 | -2.13444897 |
| H | 0.76467995  | -3.42058474 | -2.03935597 |
| C | 0.69440783  | -1.27778590 | -2.20422597 |
| K | -0.73490602 | 3.13446477  | 1.59194203  |
| K | -1.95953373 | -4.08710968 | -0.39541897 |
| C | -0.78929674 | -1.23304591 | -2.23307197 |
| C | -1.44641269 | 0.09765301  | -2.24640997 |
| C | -2.83447536 | 0.16372977  | -2.26110097 |
| H | -3.39889972 | -0.75895934 | -2.29863897 |
| C | -3.47328512 | 1.39230614  | -2.21567097 |
| H | -4.55643403 | 1.43884736  | -2.22603397 |
| O | -1.45134278 | -2.25672683 | -2.24661297 |
| C | -2.72621009 | 2.56201832  | -2.13886797 |
| H | -3.21986493 | 3.52488115  | -2.07948897 |
| C | -1.34048572 | 2.50821349  | -2.13444897 |
| H | -0.76467995 | 3.42058474  | -2.03935597 |
| C | -0.69440783 | 1.27778590  | -2.20422597 |
| K | 0.73490602  | -3.13446477 | 1.59194203  |
| O | -0.33911039 | 5.00492607  | -0.00097597 |
| O | 1.63579996  | 2.34448876  | 1.43243703  |
| O | -1.63579996 | -2.34448876 | 1.43243703  |
| O | 0.33911039  | -5.00492607 | -0.00097597 |
| C | -0.80529728 | 6.29247309  | -0.18921297 |
| C | -1.96352839 | 6.30843747  | -1.20233897 |
| C | -1.31208209 | 6.88143960  | 1.14022003  |
| C | 0.31922983  | 7.20109032  | -0.72325897 |
| H | -1.62881219 | 5.90130768  | -2.16071497 |
| H | -2.78221129 | 5.68231743  | -0.83583997 |
| H | -2.36016707 | 7.31330224  | -1.38093497 |
| H | -0.50707340 | 6.87519689  | 1.88080103  |
| H | -1.67753992 | 7.90912312  | 1.04404903  |
| H | -2.13506312 | 6.27245159  | 1.52896503  |
| H | -0.00322224 | 8.23386180  | -0.88901797 |
| H | 1.15110030  | 7.22527543  | -0.01107097 |
| H | 0.69149674  | 6.81383794  | -1.67768697 |
| C | 2.59922918  | 1.80872316  | 2.27274003  |
| C | 3.62859475  | 2.89339604  | 2.64098003  |
| C | 1.96192786  | 1.28822753  | 3.57334903  |
| C | 3.34005180  | 0.65352234  | 1.57518303  |
| H | 4.13896216  | 3.25695513  | 1.74216603  |
| H | 3.12770967  | 3.74201976  | 3.11466703  |
| H | 4.39878580  | 2.52632945  | 3.32704703  |

|   |             |             |             |
|---|-------------|-------------|-------------|
| H | 1.21267519  | 0.52604180  | 3.35159403  |
| H | 2.69822059  | 0.85753079  | 4.25965903  |
| H | 1.46233017  | 2.10885749  | 4.09788003  |
| H | 4.09920046  | 0.19315767  | 2.21637703  |
| H | 2.63442133  | -0.11960276 | 1.26583603  |
| H | 3.83594915  | 1.01897273  | 0.67168103  |
| C | -2.59922918 | -1.80872316 | 2.27274003  |
| C | -3.62859475 | -2.89339604 | 2.64098003  |
| C | -1.96192786 | -1.28822753 | 3.57334903  |
| C | -3.34005180 | -0.65352234 | 1.57518303  |
| H | -4.13896216 | -3.25695513 | 1.74216603  |
| H | -3.12770967 | -3.74201976 | 3.11466703  |
| H | -4.39878580 | -2.52632945 | 3.32704703  |
| H | -1.21267519 | -0.52604180 | 3.35159403  |
| H | -2.69822059 | -0.85753079 | 4.25965903  |
| H | -1.46233017 | -2.10885749 | 4.09788003  |
| H | -4.09920046 | -0.19315767 | 2.21637703  |
| H | -2.63442133 | 0.11960276  | 1.26583603  |
| H | -3.83594915 | -1.01897273 | 0.67168103  |
| C | 0.80529728  | -6.29247309 | -0.18921297 |
| C | 1.96352839  | -6.30843747 | -1.20233897 |
| C | 1.31208209  | -6.88143960 | 1.14022003  |
| C | -0.31922983 | -7.20109032 | -0.72325897 |
| H | 1.62881219  | -5.90130768 | -2.16071497 |
| H | 2.78221129  | -5.68231743 | -0.83583997 |
| H | 2.36016707  | -7.31330224 | -1.38093497 |
| H | 0.50707340  | -6.87519689 | 1.88080103  |
| H | 1.67753992  | -7.90912312 | 1.04404903  |
| H | 2.13506312  | -6.27245159 | 1.52896503  |
| H | 0.00322224  | -8.23386180 | -0.88901797 |
| H | -1.15110030 | -7.22527543 | -0.01107097 |
| H | -0.69149674 | -6.81383794 | -1.67768697 |
| O | -0.17102512 | 0.58512241  | 1.12026903  |
| O | 0.17102512  | -0.58512241 | 1.12026903  |

C<sub>(1)</sub>@N<sub>2</sub>

|   |            |             |             |
|---|------------|-------------|-------------|
| K | 1.56571200 | 4.70906800  | -0.74529900 |
| C | 0.62557000 | 1.32386100  | -1.95162100 |
| C | 1.44612900 | 0.08661700  | -1.89665800 |
| C | 2.83004400 | 0.20153900  | -1.84547800 |
| H | 3.27214000 | 1.18880800  | -1.87389700 |
| C | 3.61801200 | -0.93383800 | -1.74252200 |
| H | 4.69714400 | -0.83931800 | -1.69810100 |
| O | 1.15161500 | 2.41837100  | -2.04946700 |

|   |             |             |             |
|---|-------------|-------------|-------------|
| C | 3.02436100  | -2.18857900 | -1.67979600 |
| H | 3.63434000  | -3.07886000 | -1.58270700 |
| C | 1.64387000  | -2.32019500 | -1.74048100 |
| H | 1.19941400  | -3.30892000 | -1.65320000 |
| C | 0.84994000  | -1.18204700 | -1.85997500 |
| K | -0.71159400 | 3.73890600  | 1.67457500  |
| K | -1.56571200 | -4.70906800 | -0.74529900 |
| C | -0.62557000 | -1.32386100 | -1.95162100 |
| C | -1.44612900 | -0.08661700 | -1.89665800 |
| C | -2.83004400 | -0.20153900 | -1.84547800 |
| H | -3.27214000 | -1.18880800 | -1.87389700 |
| C | -3.61801200 | 0.93383800  | -1.74252200 |
| H | -4.69714400 | 0.83931800  | -1.69810100 |
| O | -1.15161500 | -2.41837100 | -2.04946700 |
| C | -3.02436100 | 2.18857900  | -1.67979600 |
| H | -3.63434000 | 3.07886000  | -1.58270700 |
| C | -1.64387000 | 2.32019500  | -1.74048100 |
| H | -1.19941400 | 3.30892000  | -1.65320000 |
| C | -0.84994000 | 1.18204700  | -1.85997500 |
| K | 0.71159400  | -3.73890600 | 1.67457500  |
| O | -0.90255700 | 5.16529400  | -0.35466700 |
| O | 1.73962300  | 3.58431100  | 1.48501200  |
| O | -1.73962300 | -3.58431100 | 1.48501200  |
| O | 0.90255700  | -5.16529400 | -0.35466700 |
| C | -1.55739300 | 6.34055400  | -0.67687700 |
| C | -2.79169000 | 6.05619900  | -1.55019200 |
| C | -2.02103700 | 7.06584600  | 0.60001500  |
| C | -0.62059000 | 7.28496700  | -1.45560300 |
| H | -2.49330300 | 5.53517800  | -2.46409000 |
| H | -3.48893700 | 5.41321700  | -1.00520600 |
| H | -3.32837000 | 6.96622200  | -1.83760700 |
| H | -1.16087400 | 7.28003900  | 1.24140800  |
| H | -2.53401800 | 8.01129600  | 0.39578400  |
| H | -2.71368900 | 6.42878900  | 1.16030000  |
| H | -1.09941200 | 8.22693900  | -1.74040500 |
| H | 0.25473300  | 7.53478300  | -0.84570100 |
| H | -0.27735900 | 6.79730000  | -2.37400200 |
| C | 2.79169000  | 3.26736400  | 2.32202400  |
| C | 3.77114100  | 4.45081400  | 2.42788200  |
| C | 2.27637200  | 2.94038900  | 3.73697200  |
| C | 3.55860400  | 2.04460400  | 1.78691800  |
| H | 4.18383900  | 4.68607700  | 1.44101600  |
| H | 3.24428900  | 5.33728700  | 2.79108800  |
| H | 4.61291800  | 4.25302200  | 3.09988200  |

|                             |             |             |             |
|-----------------------------|-------------|-------------|-------------|
| H                           | 1.57963500  | 2.09685800  | 3.69578300  |
| H                           | 3.07593300  | 2.67877700  | 4.43769000  |
| H                           | 1.74271200  | 3.80346300  | 4.14761500  |
| H                           | 4.39791000  | 1.75300000  | 2.42753300  |
| H                           | 2.88272400  | 1.19045400  | 1.69505700  |
| H                           | 3.95298400  | 2.26032000  | 0.78950100  |
| C                           | -2.79169000 | -3.26736400 | 2.32202400  |
| C                           | -3.77114100 | -4.45081400 | 2.42788200  |
| C                           | -2.27637200 | -2.94038900 | 3.73697200  |
| C                           | -3.55860400 | -2.04460400 | 1.78691800  |
| H                           | -4.18383900 | -4.68607700 | 1.44101600  |
| H                           | -3.24428900 | -5.33728700 | 2.79108800  |
| H                           | -4.61291800 | -4.25302200 | 3.09988200  |
| H                           | -1.57963500 | -2.09685800 | 3.69578300  |
| H                           | -3.07593300 | -2.67877700 | 4.43769000  |
| H                           | -1.74271200 | -3.80346300 | 4.14761500  |
| H                           | -4.39791000 | -1.75300000 | 2.42753300  |
| H                           | -2.88272400 | -1.19045400 | 1.69505700  |
| H                           | -3.95298400 | -2.26032000 | 0.78950100  |
| C                           | 1.55739300  | -6.34055400 | -0.67687700 |
| C                           | 2.79169000  | -6.05619900 | -1.55019200 |
| C                           | 2.02103700  | -7.06584600 | 0.60001500  |
| C                           | 0.62059000  | -7.28496700 | -1.45560300 |
| H                           | 2.49330300  | -5.53517800 | -2.46409000 |
| H                           | 3.48893700  | -5.41321700 | -1.00520600 |
| H                           | 3.32837000  | -6.96622200 | -1.83760700 |
| H                           | 1.16087400  | -7.28003900 | 1.24140800  |
| H                           | 2.53401800  | -8.01129600 | 0.39578400  |
| H                           | 2.71368900  | -6.42878900 | 1.16030000  |
| H                           | 1.09941200  | -8.22693900 | -1.74040500 |
| H                           | -0.25473300 | -7.53478300 | -0.84570100 |
| H                           | 0.27735900  | -6.79730000 | -2.37400200 |
| N                           | 0.28136800  | -0.46688900 | 1.80019400  |
| N                           | -0.28136800 | 0.46688900  | 1.80019400  |
| <br>                        |             |             |             |
| <sup>3</sup> O <sub>2</sub> |             |             |             |
| O                           | 0.00000000  | 0.00000000  | 0.59801900  |
| O                           | 0.00000000  | 0.00000000  | -0.59801900 |
| <br>                        |             |             |             |
| <sup>1</sup> O <sub>2</sub> |             |             |             |
| O                           | 0.00000000  | 0.00000000  | 0.59800500  |
| O                           | 0.00000000  | 0.00000000  | -0.59800500 |

|                |            |            |             |
|----------------|------------|------------|-------------|
| N <sub>2</sub> |            |            |             |
| N              | 0.00000000 | 0.00000000 | 0.54536100  |
| N              | 0.00000000 | 0.00000000 | -0.54536100 |

<sup>3</sup>O<sub>2</sub>@[AQ ·]<sup>-</sup> (<sup>1</sup>O<sub>2</sub>(CS)@[AQ ·]<sup>-</sup>, <sup>1</sup>O<sub>2</sub>(OS)@[AQ ·]<sup>-</sup>) (MSDFT)

|   |             |             |            |
|---|-------------|-------------|------------|
| O | 0.00000000  | -0.60268071 | 1.80000000 |
| O | 0.00000000  | 0.60268071  | 1.80000000 |
| C | -3.69271292 | -0.69896583 | 0.00000000 |
| C | -2.49017772 | -1.39591661 | 0.00000000 |
| C | -1.27524444 | -0.70320798 | 0.00000000 |
| C | -1.27524444 | 0.70320798  | 0.00000000 |
| C | -2.49017772 | 1.39591661  | 0.00000000 |
| C | -3.69271292 | 0.69896583  | 0.00000000 |
| C | 0.00000000  | -1.47816607 | 0.00000000 |
| C | 0.00000000  | 1.47816607  | 0.00000000 |
| C | 1.27524444  | 0.70320798  | 0.00000000 |
| C | 1.27524444  | -0.70320798 | 0.00000000 |
| C | 2.49017772  | -1.39591661 | 0.00000000 |
| C | 3.69271292  | -0.69896583 | 0.00000000 |
| C | 3.69271292  | 0.69896583  | 0.00000000 |
| C | 2.49017772  | 1.39591661  | 0.00000000 |
| O | 0.00000000  | 2.69827166  | 0.00000000 |
| O | 0.00000000  | -2.69827166 | 0.00000000 |
| H | 2.46836053  | -2.47935825 | 0.00000000 |
| H | -4.63231729 | -1.24171212 | 0.00000000 |
| H | -2.46836053 | -2.47935825 | 0.00000000 |
| H | -2.46836053 | 2.47935825  | 0.00000000 |
| H | -4.63231729 | 1.24171212  | 0.00000000 |
| H | 4.63231729  | -1.24171212 | 0.00000000 |
| H | 4.63231729  | 1.24171212  | 0.00000000 |
| H | 2.46836053  | 2.47935825  | 0.00000000 |
